# Supplementary material
Source: PubMed Central journal article supplement (PMC5696111)
Supplement: NIHMS878295-supplement-supplement_1.pdf [file NIHMS878295-supplement-supplement_1.pdf]

- 1 **Supplementary Table 1:** Rate ratios for treatment failures and exacerbations for low vs. high income  
2 Groups  
3 **Model 1:** adjusted for treatment regimen (vitamin D vs. placebo), study site, race and BMI  
4 **Model 2:** adjusted for same covariates as Model 1, and for ethnicity and household size  
5 **Model 3:** adjusted for same covariates as Model 2, and for baseline %predicted FEV<sub>1</sub> and max  
6 bronchodilator response to albuterol  
7 **Model 4:** adjusted for same covariates as Model 2, and for hospitalization rate in the year prior to enrollment.  
8 **Model 5:** adjusted for same covariates as Model 2, and for second hand smoke exposure in the household.  
9 **Model 6:** adjusted for same covariates as Model 2, and for household education and perceived stress.  
10 **Model 7:** adjusted for same covariates as Model 2, and for age and gender.  
11  
12 **Supplementary Table 2:** Treatment failure rate by race, stratified by income level, with adjustment for  
13 **study site, race, BMI, and treatment**  
14  
15 **Supplementary Table 3:** Demographic, clinical and phenotypic characteristics by income level  
16 <sup>C</sup> N (%), Chi-square test  
17 <sup>F</sup> N (%), Fisher's Exact test  
18 <sup>T</sup> Mean (SD), T-test  
19 <sup>W</sup> Median (IQR), Wilcoxon rank-sum test  
20 <sup>TL</sup> Geometric mean (CV), T-test on log scale  
21  
22

Supplementary Table 1

| Model | Outcome            | Group Comparison           | Poisson Regression Rate Ratio (95% CI) | P-value     |
|-------|--------------------|----------------------------|----------------------------------------|-------------|
| 1     | Treatment Failures | Low vs. High income groups | 1.5 (1.0—2.2)                          | <b>0.03</b> |
|       | Exacerbations      | Low vs. High income groups | 1.8 (1.1—3.1)                          | <b>0.03</b> |
| 2     | Treatment Failures | Low vs. High income groups | 1.5 (1.1—2.3)                          | <b>0.03</b> |
|       | Exacerbations      | Low vs. High income groups | 1.9 (1.1—3.3)                          | <b>0.02</b> |
| 3     | Treatment Failures | Low vs. High income groups | 1.5 (1.0—2.2)                          | <b>0.04</b> |
|       | Exacerbations      | Low vs. High income groups | 1.8 (1.0—3.2)                          | <b>0.04</b> |
| 4     | Treatment Failures | Low vs. High income groups | 1.5 (1.0—2.2)                          | <b>0.04</b> |
|       | Exacerbations      | Low vs. High income groups | 1.8 (1.0—3.2)                          | <b>0.04</b> |
| 5     | Treatment Failures | Low vs. High income groups | 1.6 (1.1—2.3)                          | <b>0.02</b> |
|       | Exacerbations      | Low vs. High income groups | 2.0 (1.1—3.4)                          | <b>0.02</b> |
| 6     | Treatment Failures | Low vs. High income groups | 1.6 (1.0—2.3)                          | <b>0.03</b> |
|       | Exacerbations      | Low vs. High income groups | 2.1 (1.1—3.8)                          | <b>0.02</b> |
| 7     | Treatment Failures | Low vs. High income groups | 1.6 (1.1—2.3)                          | <b>0.03</b> |
|       | Exacerbations      | Low vs. High income groups | 1.9 (1.1—3.3)                          | <b>0.02</b> |

Supplementary Table 2

| Outcome            | Race      | Income Level | Treatment failures (per person-year (95%CI)) | Test of race by income interaction (P-value) |
|--------------------|-----------|--------------|----------------------------------------------|----------------------------------------------|
| Treatment failures | Black     | Low          | 1.17 (0.81, 1.68)                            | 0.72                                         |
|                    |           | High         | 0.71 (0.37, 1.34)                            |                                              |
|                    | Non-Black | Low          | 0.69 (0.50, 0.97)                            |                                              |
|                    |           | High         | 0.49 (0.34, 0.70)                            |                                              |
| Exacerbations      | Black     | Low          | 0.46 (0.27, 0.77)                            | 0.99                                         |
|                    |           | High         | 0.25 (0.10, 0.64)                            |                                              |
|                    | Non-Black | Low          | 0.43 (0.28, 0.66)                            |                                              |
|                    |           | High         | 0.23 (0.14, 0.39)                            |                                              |

Supplementary Table 3

| CHARACTERISTICS                                                | Low income (n=207)                        | High income (n=174)                         | P-value           |
|----------------------------------------------------------------|-------------------------------------------|---------------------------------------------|-------------------|
| Age <sup>T</sup>                                               | 40.1 (12.6)                               | 39.7 (12.8)                                 | 0.76              |
| Gender (M) <sup>C</sup>                                        | 49 (23.7%)                                | 74 (42.5%)                                  | <b>&lt;0.01</b>   |
| Race <sup>F</sup>                                              |                                           |                                             | <b>&lt;0.01</b>   |
| American Indian/Alaskan Native                                 | 0 (0.0%)                                  | 1 (0.6%)                                    |                   |
| Asian and Pacific Islander                                     | 4 (1.9%)                                  | 9 (5.2%)                                    |                   |
| Black                                                          | 91 (44.0%)                                | 32 (18.4%)                                  |                   |
| White                                                          | 90 (43.5%)                                | 113 (64.9%)                                 |                   |
| Hispanic                                                       | 19 (9.2%)                                 | 17 (9.8%)                                   |                   |
| Other                                                          | 3 (1.4%)                                  | 2 (1.1%)                                    |                   |
| Ethnicity (Hispanic or Latino) <sup>C</sup>                    | 22 (10.6%)                                | 20 (11.5%)                                  | 0.79              |
| Household Educational level (< Bachelor's Degree) <sup>C</sup> | 112 (54.4%)                               | 40 (23.1%)                                  | <b>&lt;0.0001</b> |
| Perceived Stress Level ( $\geq 20$ ) <sup>C</sup>              | 43 (21%)                                  | 22 (12.6%)                                  | <b>0.04</b>       |
| BMI (kg/m <sup>2</sup> ) <sup>T</sup>                          | 33.3 (10.2)                               | 30.3 (6.7)                                  | <b>&lt;0.01</b>   |
| Baseline Vitamin D level <sup>T</sup>                          | 18.2 (7.1)                                | 19.4 (6.4)                                  | 0.09              |
| Attained sufficient Vitamin D level <sup>C</sup>               | 86 (44.3%)                                | 76 (46.1%)                                  | 0.74              |
| Second hand smoke exposure in the household <sup>C</sup>       | 20 (9.7%)                                 | 8 (4.6%)                                    | 0.06              |
| <i>Clinical history in the year prior to enrollment:</i>       |                                           |                                             |                   |
| ED/unscheduled office visit <sup>C</sup>                       | 76 (36.7%)                                | 56 (32.2%)                                  | 0.35              |
| Hospitalizations <sup>C</sup>                                  | 15 (7.2%)                                 | 4 (2.3%)                                    | <b>0.03</b>       |
| Missed work/school (0 / 1-7 / >7 days) <sup>C</sup>            | 116 (56%) /<br>60 (29.0%) /<br>31 (15.0%) | 108 (62.4%) /<br>46 (26.6%) /<br>19 (11.0%) | 0.37              |
| <i>Controller medications</i>                                  |                                           |                                             |                   |
| LTRA or 5-LO inhibitor use <sup>C</sup>                        | 44 (21.4%)                                | 49 (28.2%)                                  | 0.12              |
| Inhaled corticosteroids <sup>C</sup>                           | 94 (45.4%)                                | 67 (38.5%)                                  | 0.17              |
| Inhaled + long acting bronchodilator <sup>C</sup>              | 130 (62.8%)                               | 108 (62.4%)                                 | 0.94              |
| <i>Asthma control</i>                                          |                                           |                                             |                   |
| Asthma symptom Utility index score <sup>T</sup>                | 0.82 (0.13)                               | 0.83 (0.11)                                 | 0.41              |
| ACT score <sup>T</sup>                                         | 18.8 (3.6)                                | 19.5 (2.8)                                  | <b>0.03</b>       |
| <i>Spirometric and physiological studies</i>                   |                                           |                                             |                   |
| Pre-bronchodilator FEV1 at baseline (%predicted) <sup>T</sup>  | 79.9 (13.9)                               | 81.6 (13.5)                                 | <b>0.23</b>       |
| Bronchodilator response-                                       | 15.4 (11.6)                               | 13.2 (8.1)                                  | <b>0.03</b>       |

|                                                                              |            |            |      |
|------------------------------------------------------------------------------|------------|------------|------|
| -reversibility with 4 puffs of albuterol (% change) at baseline <sup>T</sup> |            |            |      |
| Methacholine PC20 (mg/mL) <sup>TL</sup>                                      | 1.8 (1.6)  | 2.1 (1.7)  | 0.35 |
| Sputum eosinophils (%) <sup>W</sup>                                          | 0.4 (1.4)  | 0.3 (1.0)  | 0.42 |
| <i>Sensitization to aeroallergens</i>                                        |            |            |      |
| Cockroach <sup>C</sup>                                                       | 51 (25.8%) | 32 (19.4%) | 0.15 |
| Cat <sup>C</sup>                                                             | 97 (49.2%) | 79 (47.9%) | 0.80 |
| Dog <sup>C</sup>                                                             | 56 (28.4%) | 49 (29.7%) | 0.79 |
| Rat <sup>C</sup>                                                             | 44 (22.2%) | 38 (23.0%) | 0.85 |
| Mouse <sup>C</sup>                                                           | 60 (30.3%) | 60 (36.4%) | 0.22 |
| Dust mites <sup>C</sup>                                                      | 97 (49.2%) | 88 (53.3%) | 0.44 |
| Mold <sup>C</sup>                                                            | 49 (24.7%) | 42 (25.5%) | 0.88 |
| Tree mix <sup>C</sup>                                                        | 49 (24.7%) | 48 (29.1%) | 0.35 |
| Grass mix <sup>C</sup>                                                       | 92 (46.5%) | 77 (46.7%) | 0.97 |
| Weed mix <sup>C</sup>                                                        | 82 (41.4%) | 76 (46.1%) | 0.37 |
